# Supplementary material
Source: PubMed Central journal article supplement (PMC4657582)

## SUPPLEMENTARY DATA

### **Title: Genetic Evidence for a Causal Role of Obesity in Diabetic Kidney Disease**

Jennifer N. Todd, Emma H. Dahlström, Rany M. Salem, Niina Sandholm, Carol Forsblom, the FinnDiane Study Group, Amy J. McKnight, Alexander P. Maxwell, Eoin Brennan, Denise Sadlier, Catherine Godson, Per-Henrik Groop, Joel N. Hirschhorn, Jose C. Florez

SUPPLEMENTARY DATA

**Supplementary Table 1.** Characteristics of contributing cohorts.

|                             | US-GoKinD                                                                                                                                                                                                                        | UK-ROI                                                                                                                                                                                                                                                                                                            | FinnDiane                                                                                                                                                                                                                                                                                                                                              |
|-----------------------------|----------------------------------------------------------------------------------------------------------------------------------------------------------------------------------------------------------------------------------|-------------------------------------------------------------------------------------------------------------------------------------------------------------------------------------------------------------------------------------------------------------------------------------------------------------------|--------------------------------------------------------------------------------------------------------------------------------------------------------------------------------------------------------------------------------------------------------------------------------------------------------------------------------------------------------|
| Inclusion criteria          | Diabetes diagnosis before 31 years of age AND began insulin treatment within 1 year of diagnosis                                                                                                                                 | Diabetes diagnosis before 31 years of age                                                                                                                                                                                                                                                                         | Diabetes diagnosis before 40 years of age AND began insulin treatment within 1 year of diagnosis                                                                                                                                                                                                                                                       |
| Macroalbuminuria definition | One of the following: <ul style="list-style-type: none"> <li>At least 2 out of 3 tests positive for albuminuria by dipstick <math>\geq 1+</math>,</li> <li>ACR <math>&gt;300</math> mg albumin/mg of urine creatinine</li> </ul> | All of the following: <ul style="list-style-type: none"> <li>Persistent proteinuria (<math>&gt;500</math> mg/24 h) developing more than 10 years after diabetes diagnosis</li> <li>Hypertension (<math>&gt;135/85</math> mm/Hg and/or treatment with antihypertensive medication)</li> <li>Retinopathy</li> </ul> | One of the following: <ul style="list-style-type: none"> <li>AER <math>\geq 200</math> mg/min or <math>\geq 300</math> mg/24 hr in 2 out of 3 consecutive measurements</li> <li>ACR <math>\geq 25</math> mg/mmol for men or <math>\geq 35</math> mg/mmol for women in 2 out of 3 consecutive measurements</li> </ul>                                   |
| ESRD definition             | Requiring dialysis treatment or kidney transplant                                                                                                                                                                                | Requiring dialysis treatment or kidney transplant                                                                                                                                                                                                                                                                 | Requiring dialysis treatment or kidney transplant                                                                                                                                                                                                                                                                                                      |
| Control definition          | ACR $<20$ mg/mg                                                                                                                                                                                                                  | ACR $<20$ mg/mg                                                                                                                                                                                                                                                                                                   | One of the following: <ul style="list-style-type: none"> <li>AER <math>&lt; 20</math> mg/min or <math>&lt;30</math> mg/24 h in 2 out of 3 consecutive measurements</li> <li>ACR <math>&lt; 2.5</math> mg/mmol for men or <math>&lt; 3.5</math> mg/mmol for women in 2 out of 3 consecutive measurements</li> </ul>                                     |
| Microalbuminuria definition | Not included                                                                                                                                                                                                                     | Not included                                                                                                                                                                                                                                                                                                      | One of the following: <ul style="list-style-type: none"> <li>AER <math>\geq 20 &lt; 200</math> mg/min or <math>\geq 30 &lt; 300</math> mg/24 h in 2 out of 3 consecutive measurements</li> <li>ACR <math>\geq 2.5 &lt; 200</math> mg/mmol for men or <math>\geq 3.5 &lt; 35</math> mg/mmol for women in 2 out of 3 consecutive measurements</li> </ul> |
| Ethnicity                   | Caucasian                                                                                                                                                                                                                        | Parents and grandparents born in UK and/or Ireland                                                                                                                                                                                                                                                                | Ethnic Finns                                                                                                                                                                                                                                                                                                                                           |
| Genotyping platform         | Affymetrix 500 K set                                                                                                                                                                                                             | Illumina Omni1-Quad array                                                                                                                                                                                                                                                                                         | Illumina BeadArray 610-Quad array                                                                                                                                                                                                                                                                                                                      |

SUPPLEMENTARY DATA

**Supplementary Table 2.** Variants included in the BMI genetic risk score: BMI effect size in the GIANT consortium.

| SNP        | Nearest Gene    | Chr | Position  | Risk Allele | Risk Allele Frequency | BMI effect size (kg/m <sup>2</sup> ) | P-Value   |
|------------|-----------------|-----|-----------|-------------|-----------------------|--------------------------------------|-----------|
| rs1558902  | <i>FTO</i>      | 16  | 53803574  | A           | 0.42                  | 0.39                                 | 5.00E-120 |
| rs2867125  | <i>TMEM18</i>   | 2   | 622827    | C           | 0.83                  | 0.31                                 | 3.00E-49  |
| rs571312   | <i>MC4R</i>     | 18  | 57839769  | A           | 0.24                  | 0.23                                 | 6.00E-42  |
| rs10938397 | <i>GNPDA2</i>   | 4   | 45182527  | G           | 0.43                  | 0.18                                 | 4.00E-31  |
| rs10767664 | <i>BDNF</i>     | 11  | 27725986  | A           | 0.78                  | 0.19                                 | 5.00E-26  |
| rs2815752  | <i>NEGR1</i>    | 1   | 72812440  | A           | 0.61                  | 0.13                                 | 2.00E-22  |
| rs7359397  | <i>SH2B1</i>    | 16  | 28885659  | T           | 0.4                   | 0.15                                 | 2.00E-20  |
| rs9816226  | <i>ETV5</i>     | 3   | 185834499 | T           | 0.82                  | 0.14                                 | 2.00E-18  |
| rs3817334  | <i>MTCH2</i>    | 11  | 47650993  | T           | 0.41                  | 0.06                                 | 2.00E-12  |
| rs29941    | <i>KCTD15</i>   | 19  | 34309532  | G           | 0.67                  | 0.06                                 | 3.00E-09  |
| rs543874   | <i>SEC16B</i>   | 1   | 177889480 | G           | 0.19                  | 0.22                                 | 4.00E-23  |
| rs987237   | <i>TFAP2B</i>   | 6   | 50803050  | G           | 0.18                  | 0.13                                 | 3.00E-20  |
| rs7138803  | <i>FAIM2</i>    | 12  | 50247468  | A           | 0.38                  | 0.12                                 | 2.00E-17  |
| rs10150332 | <i>NRXN3</i>    | 14  | 79936964  | C           | 0.21                  | 0.13                                 | 3.00E-11  |
| rs713586   | <i>RBJ</i>      | 2   | 25158008  | C           | 0.47                  | 0.14                                 | 6.00E-22  |
| rs12444979 | <i>GPRC5B</i>   | 16  | 19933600  | C           | 0.87                  | 0.17                                 | 3.00E-21  |
| rs2241423  | <i>MAP2K5</i>   | 15  | 68086838  | G           | 0.78                  | 0.13                                 | 1.00E-18  |
| rs2287019  | <i>QPCTL</i>    | 19  | 46202172  | C           | 0.8                   | 0.15                                 | 2.00E-16  |
| rs1514175  | <i>TNNI3K</i>   | 1   | 74991644  | A           | 0.43                  | 0.07                                 | 8.00E-14  |
| rs13107325 | <i>SLC39A8</i>  | 4   | 103188709 | T           | 0.07                  | 0.19                                 | 2.00E-13  |
| rs2112347  | <i>FLJ35779</i> | 5   | 75015242  | T           | 0.63                  | 0.1                                  | 2.00E-13  |
| rs10968576 | <i>LRRN6C</i>   | 9   | 28414339  | G           | 0.31                  | 0.11                                 | 3.00E-13  |
| rs3810291  | <i>TMEM160</i>  | 19  | 47569003  | A           | 0.67                  | 0.09                                 | 2.00E-12  |
| rs887912   | <i>FANCL</i>    | 2   | 59302877  | T           | 0.29                  | 0.1                                  | 2.00E-12  |
| rs13078807 | <i>CADM2</i>    | 3   | 85884150  | G           | 0.2                   | 0.1                                  | 4.00E-11  |
| rs11847697 | <i>PRKD1</i>    | 14  | 30515112  | T           | 0.04                  | 0.17                                 | 6.00E-11  |
| rs2890652  | <i>LRP1B</i>    | 2   | 142959931 | C           | 0.18                  | 0.09                                 | 1.00E-10  |
| rs1555543  | <i>PTBP2</i>    | 1   | 96944797  | C           | 0.59                  | 0.06                                 | 4.00E-10  |
| rs4771122  | <i>MTIF3</i>    | 13  | 28020180  | G           | 0.24                  | 0.09                                 | 9.00E-10  |
| rs4836133  | <i>ZNF608</i>   | 5   | 124332103 | A           | 0.48                  | 0.07                                 | 2.00E-09  |
| rs4929949  | <i>RPL27A</i>   | 11  | 8604593   | C           | 0.52                  | 0.06                                 | 3.00E-09  |
| rs206936   | <i>NUDT3</i>    | 6   | 34302869  | G           | 0.21                  | 0.06                                 | 3.00E-08  |

SUPPLEMENTARY DATA

**Supplementary Table 3.** The Finnish Diabetic Nephropathy Study Centers

| FinnDiane Study Centers                                                                                 | Physicians and nurses                                                                                                                                                                                           |
|---------------------------------------------------------------------------------------------------------|-----------------------------------------------------------------------------------------------------------------------------------------------------------------------------------------------------------------|
| Anjalankoski Health Center                                                                              | S. Koivula, T. Uggeldahl                                                                                                                                                                                        |
| Central Finland Central Hospital, Jyväskylä                                                             | T. Forslund, A. Halonen, A. Koistinen, P. Koskiaho, M. Laukkanen, J. Saltevo, M. Tiihonen                                                                                                                       |
| Central Hospital of Åland Islands, Mariehamn                                                            | M. Forsen, H. Granlund, A-C. Jonsson, B. Nyroos                                                                                                                                                                 |
| Central Hospital of Kanta-Häme, Hämeenlinna                                                             | P. Kinnunen, A. Orvola, T. Salonen, A. Vähänen                                                                                                                                                                  |
| Central Hospital of Länsi-Pohja, Kemi                                                                   | H. Laukkanen, P. Nyländen, A. Sademies                                                                                                                                                                          |
| Central Ostrabothnian Hospital District, Kokkola                                                        | S. Anderson, B. Asplund, U. Byskata, M. Kuusela, P. Liedes, T. Virkkala                                                                                                                                         |
| City of Espoo Health Centre:                                                                            |                                                                                                                                                                                                                 |
| -Espoonlahti                                                                                            | A. Nikkola, E. Ritola                                                                                                                                                                                           |
| -Samaria                                                                                                | E. Oukko-Ruponen, T. Virtanen                                                                                                                                                                                   |
| -Tapiola                                                                                                | M. Niska, H. Saarinen                                                                                                                                                                                           |
| -Viherlaakso                                                                                            | A. Lyytinen                                                                                                                                                                                                     |
| City of Helsinki Health Centre:                                                                         |                                                                                                                                                                                                                 |
| -Puistola                                                                                               | H. Kari, T. Simonen                                                                                                                                                                                             |
| -Suutarila                                                                                              | A. Kaprio, J. Kärkkäinen, B. Rantaeskola                                                                                                                                                                        |
| -Töölö                                                                                                  | J. Haaga, P. Kääriäinen, A-L. Pietiläinen                                                                                                                                                                       |
| City of Hyvinkää Health Centre                                                                          | S. Klemetti, T. Nyandoto, E. Rontu, S. Satuli-Autere                                                                                                                                                            |
| City of Vantaa Health Centre:                                                                           |                                                                                                                                                                                                                 |
| -Korso                                                                                                  | R. Toivonen, H. Virtanen                                                                                                                                                                                        |
| -Länsimäki                                                                                              | R. Ahonen, M. Ivaska-Suomela, A. Jauhiainen                                                                                                                                                                     |
| -Martinlaakso                                                                                           | M. Laine, T. Pellonpää, R. Puranen                                                                                                                                                                              |
| -Myyrmäki                                                                                               | A. Airas, J. Laakso, K. Rautavaara                                                                                                                                                                              |
| -Rekola                                                                                                 | M. Erola, E. Jatkola                                                                                                                                                                                            |
| -Tikkurila                                                                                              | R. Lönnblad, A. Malm, J. Mäkelä, E. Rautamo                                                                                                                                                                     |
| Heinola Health Centre                                                                                   | P. Hentunen, J. Lagerstam                                                                                                                                                                                       |
| Abdominal Center Nephrology, University of Helsinki and Helsinki University Hospital, Helsinki, Finland | M. Feodoroff, D. Gordin, K. Hietala, M. Parkkonen, M. Rahkonen, M. Rosengård-Bärlund, A.-R. Salonen, L. Salovaara, A. Sandelin, M. Saraheimo, T. Soppela, A. Soro-Paavonen, L. Thorn, J. Tuomikangas, J. Wadén, |
| Ophthalmology, University of Helsinki and Helsinki University Hospital, Helsinki, Finland               | P.Summanen                                                                                                                                                                                                      |
| Herttoniemi Hospital, Helsinki                                                                          | V. Sipilä                                                                                                                                                                                                       |
| Hospital of Lounais-Häme, Forssa                                                                        | T. Kalliomäki, J. Koskelainen, R. Nikkanen, N. Savolainen, H. Sulonen, E. Valtonen                                                                                                                              |

## SUPPLEMENTARY DATA

|                                                      |                                                                                                                                                              |
|------------------------------------------------------|--------------------------------------------------------------------------------------------------------------------------------------------------------------|
| Hyvinkää Hospital                                    | A. Hämäläinen, L. Norvio                                                                                                                                     |
| Iisalmi Hospital                                     | E. Toivanen                                                                                                                                                  |
| Jokilaakso Hospital, Jämsä                           | A. Parta, I. Pirttiniemi                                                                                                                                     |
| Jorvi Hospital, Helsinki University Central Hospital | S. Aranko, S. Ervasti, R. Kauppinen-Mäkelin, A. Kuusisto, T. Leppälä, K. Nikkilä, L. Pekkonen                                                                |
| Jyväskylä Health Centre, Kyllö                       | K. Nuorva, M. Tiihonen                                                                                                                                       |
| Kainuu Central Hospital, Kajaani                     | S. Jokelainen, P. Kempainen, A-M. Mankinen, M. Sankari                                                                                                       |
| Kerava Health Centre                                 | H. Stuckey, P. Suominen                                                                                                                                      |
| Kirkkonummi Health Centre                            | A. Lappalainen, M. Liimatainen, J. Santaholma                                                                                                                |
| Kivelä Hospital, Helsinki                            | A. Aimolahti, E. Huovinen                                                                                                                                    |
| Koskela Hospital, Helsinki                           | V. Ikka, M. Lehtimäki                                                                                                                                        |
| Kotka Health Centre                                  | E. Pälikkö-Kontinen, A. Vanhanen                                                                                                                             |
| Kouvola Health Centre                                | E. Koskinen, T. Siitonen                                                                                                                                     |
| Kuopio University Hospital                           | E. Huttunen, R. Ikäheimo, P. Karhapää, P. Kekäläinen, T. Lakka, M. Laakso, E. Lampainen, L. Moilanen, L. Niskanen, U. Tuovinen, I. Vauhkonen, E. Voutilainen |
| Kuusamo Health Centre                                | E. Isopoussu, T. Kääriäinen                                                                                                                                  |
| Kuusankoski Hospital                                 | E. Kilkki, I. Koskinen, L. Riihelä                                                                                                                           |
| Laakso Hospital, Helsinki                            | T. Meriläinen, P. Poukka, R. Savolainen, N. Uhlenius                                                                                                         |
| Lahti City Hospital                                  | A. Mäkelä, M. Tanner                                                                                                                                         |
| Lapland Central Hospital, Rovaniemi                  | L. Hyvärinen, S. Severinkangas, T. Tulokas                                                                                                                   |
| Lappeenranta Health Centre                           | P. Linkola, I. Pulli                                                                                                                                         |
| Lohja Hospital                                       | T. Granlund, M. Saari, T. Salonen                                                                                                                            |
| Loimaa Health Centre                                 | P. Eloranta, A. Mäkelä                                                                                                                                       |
| Länsi-Uusimaa Hospital, Tammisaari                   | I-M. Jousmaa, J. Rinne                                                                                                                                       |
| Malmi Hospital, Helsinki                             | H. Lanki, S. Moilanen, M. Tilly-Kiesi                                                                                                                        |
| Mikkeli Central Hospital                             | A. Gynther, R. Manninen, P. Nironen, M. Salminen, T. Vääntinen                                                                                               |
| Mänttä Regional Hospital                             | A-M. Hänninen, I. Pirttiniemi                                                                                                                                |
| North Karelian Hospital, Joensuu                     | U-M. Henttula, P. Kekäläinen, M. Pietarinen, A. Rissanen, M. Voutilainen                                                                                     |
| Nurmijärvi Health Centre                             | A. Burgos, K. Urtamo                                                                                                                                         |
| Oulankangas Hospital, Oulainen                       | E. Jokelainen, P-L. Jylkkä, E. Kaarlela, J. Vuolaspuro                                                                                                       |
| Oulu Health Centre                                   | L. Hiltunen, R. Häkkinen, S. Keinänen-Kiukaanniemi                                                                                                           |
| Oulu University Hospital                             | R. Ikäheimo                                                                                                                                                  |
| Päijät-Häme Central Hospital                         | H. Haapamäki, A. Helanterä, S. Hämäläinen, V. Ilvesmäki, H. Miettinen                                                                                        |
| Palokka Health Centre                                | P. Sapanen, L. Welling                                                                                                                                       |
| Pieksämäki Hospital                                  | V. Javtsenko, M. Tamminen                                                                                                                                    |

## SUPPLEMENTARY DATA

|                                              |                                                                                                                                    |
|----------------------------------------------|------------------------------------------------------------------------------------------------------------------------------------|
| Pietarsaari Hospital                         | M-L. Holmbäck, B. Isomaa, L. Sarelin                                                                                               |
| Pori City Hospital                           | P. Ahonen, P. Merensalo, K. Sävelä                                                                                                 |
| Porvoo Hospital                              | M. Kallio, B. Rask, S. Rämö                                                                                                        |
| Raahe Hospital                               | A. Holma, M. Honkala, A. Tuomivaara, R. Vainionpää                                                                                 |
| Rauma Hospital                               | K. Laine, K. Saarinen, T. Salminen                                                                                                 |
| Riihimäki Hospital                           | P. Aalto, E. Immonen, L. Juurinen                                                                                                  |
| Salo Hospital                                | A. Alanko, J. Lapinleimu, P. Rautio, M. Virtanen                                                                                   |
| Satakunta Central Hospital, Pori             | M. Asola, M. Juhola, P. Kunelius, M-L. Lahdenmäki, P. Pääkkönen, M. Rautavirta                                                     |
| Savonlinna Central Hospital                  | E. Korpi-Hyövälti, T. Latvala, E. Leijala                                                                                          |
| South Karelia Central Hospital, Lappeenranta | T. Ensala, E. Hussi, R. Härkönen, U. Nyholm, J. Toivanen                                                                           |
| Tampere Health Centre                        | P. Alarotu, L. Calonius, S. Gummerus, M. Helin, T. Kaitala, H. Kirkkopelto-Jokinen, E. Kujansuu, T. Niskanen, A. Vaden, T. Vatanen |
| Tampere University Hospital                  | I. Ala-Houhala, T. Kuningas, P. Lampinen, M. Määttä, H. Oksala, T. Oksanen, K. Salonen, H. Tauriainen, S. Tulokas                  |
| Tiirismaa Health Centre, Hollola             | T. Kivelä, L. Petlin, L. Savolainen                                                                                                |
| Turku Health Centre                          | I. Hämäläinen, H. Virtamo, M. Vähätalo                                                                                             |
| Turku University Central Hospital            | K. Breitholz, R. Eskola, K. Metsärinne, U. Pietilä, P. Saarinen, R. Tuominen, S. Äyräpää                                           |
| Vaajakoski Health Centre                     | K. Mäkinen, P. Sopenen                                                                                                             |
| Vaasa Central Hospital                       | S. Bergkulla, U. Hautamäki, V-A. Myllyniemi, I. Rusk                                                                               |
| Valkeakoski Regional Hospital                | T. Immonen, S. Ojanen, M. Rautiainen, E. Valtonen, H. Ylönen                                                                       |
| Vammala Regional Hospital                    | I. Isomäki, R. Kroneld, M. Tapiolinna-Mäkelä                                                                                       |

SUPPLEMENTARY DATA

**Supplementary Figure 1.** Selection of subjects for FinnDiane cross-sectional and longitudinal analyses.

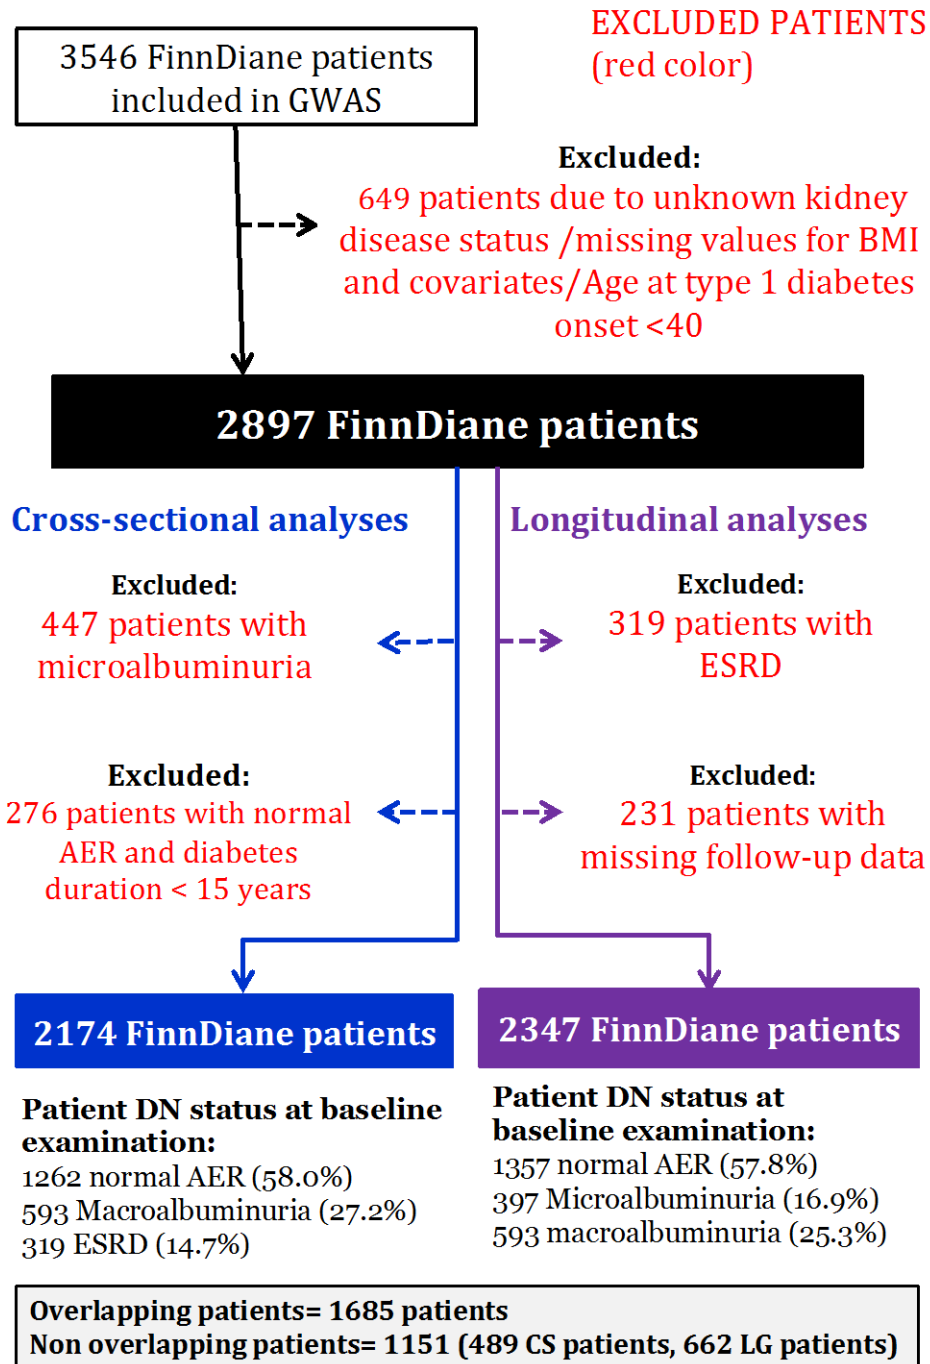

Supplement: supp_db15-0254_DB150254SupplementaryData.pdf [file supp_db15-0254_DB150254SupplementaryData.pdf]
